# Supplementary material
Source: Springer Nature journal article supplement (https://www.springermedizin.de/resource/supplementary/13000_2009_207_MOESM2_ESM.pdf/9624162)

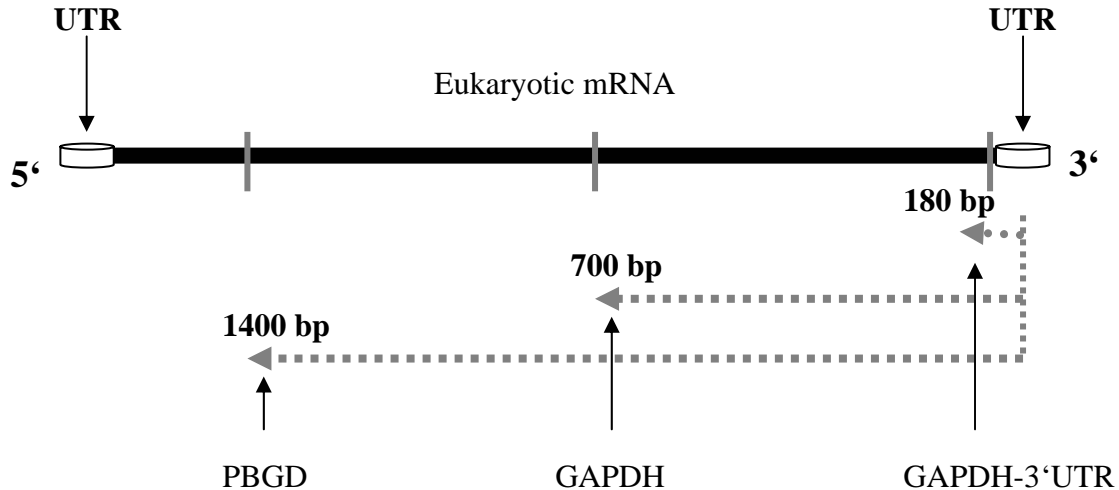

Supplement: MOESM2 [file 9624162]
